# Supplementary material
Source: ML conference proceedings conference paper supplement (https://openaccess.thecvf.com/content/CVPR2024/html/Chen_Would_Deep_Generative_CVPR_2024_paper.html)
Supplement: Supplementary file 1 [file Chen_Would_Deep_Generative_CVPR_2024_supplemental.pdf]

# Would Deep Generative Models Amplify Bias in Future Models?

## Supplementary Material

Table 1. Details of the common (with no social attributes) image retrieval results for OpenCLIP.

| (a) COCO image retrieval |       |       |       |       |       |       |
|--------------------------|-------|-------|-------|-------|-------|-------|
| Flickr30K IR             | 0.0   | 0.2   | 0.4   | 0.6   | 0.8   | 1.0   |
| @1                       | 6.23  | 6.66  | 6.04  | 6.23  | 5.98  | 5.21  |
| @5                       | 17.09 | 17.91 | 16.99 | 17.65 | 17.25 | 14.44 |
| @10                      | 24.45 | 26.13 | 24.39 | 25.61 | 25.07 | 21.02 |

| (b) Flickr30k image retrieval |       |       |       |       |       |       |
|-------------------------------|-------|-------|-------|-------|-------|-------|
| Flickr30K IR                  | 0.0   | 0.2   | 0.4   | 0.6   | 0.8   | 1.0   |
| @1                            | 4.79  | 5.29  | 4.81  | 5.47  | 5.25  | 4.47  |
| @5                            | 13.40 | 14.75 | 13.51 | 14.83 | 14.77 | 12.64 |
| @10                           | 19.19 | 21.13 | 20.17 | 21.49 | 21.35 | 18.69 |

Table 2. Details of the image retrieval performance and bias metrics for OpenCLIP in COCO dataset with gender and skin tone annotation. Characters in the table are: 1) In gender: **Man** and **Woman**; 2) In skin tone: **Lighter** and **Darker**.

| $\alpha$ |     | All  | gender |      | skin-tone |      |
|----------|-----|------|--------|------|-----------|------|
|          |     |      | M      | W    | L         | D    |
| 0.0      | @1  | 3.1  | 3.0    | 3.2  | 3.4       | 3.2  |
|          | @5  | 9.2  | 9.2    | 10.3 | 10.1      | 9.2  |
|          | @10 | 13.7 | 13.7   | 15.1 | 15.0      | 13.4 |
| 0.2      | @1  | 3.2  | 2.9    | 4.5  | 3.6       | 2.9  |
|          | @5  | 9.7  | 9.6    | 11.5 | 10.9      | 10.6 |
|          | @10 | 14.8 | 15.1   | 17.1 | 16.6      | 16.5 |
| 0.4      | @1  | 3.0  | 3.1    | 3.9  | 3.7       | 1.9  |
|          | @5  | 9.2  | 9.3    | 11.1 | 10.8      | 8.0  |
|          | @10 | 13.8 | 14.1   | 16.2 | 15.8      | 14.3 |
| 0.6      | @1  | 3.4  | 3.4    | 4.1  | 3.8       | 3.3  |
|          | @5  | 9.7  | 9.9    | 11.7 | 11.0      | 11.5 |
|          | @10 | 14.7 | 15.1   | 17.6 | 16.7      | 17.1 |
| 0.8      | @1  | 3.5  | 3.4    | 4.9  | 3.9       | 4.8  |
|          | @5  | 9.8  | 10.0   | 12.2 | 11.1      | 12.2 |
|          | @10 | 14.5 | 14.9   | 17.7 | 16.5      | 17.1 |
| 1.0      | @1  | 2.7  | 3.0    | 3.0  | 3.2       | 3.5  |
|          | @5  | 8.8  | 9.6    | 10.2 | 10.1      | 11.3 |
|          | @10 | 13.1 | 14.4   | 15.2 | 15.1      | 16.2 |

Table 3. Details of the image retrieval performance and bias metrics for OpenCLIP in PHASE dataset. Characters in each table are: 1) In gender: **Man** and **Woman**; 2) In age: **Baby** and **Child**; 3) In skin tone: **Lighter** and **Darker**; 4) In ethnicity: **Black**, **East Asia**, **Indian**, **Latino**, **Middle East**, **Southeast Asia**, and **White**.

| $\alpha$ | All | age  |       |       |        |      | gender |      | skin-tone |      | Ethnicity |     |      |      |      |     |      |
|----------|-----|------|-------|-------|--------|------|--------|------|-----------|------|-----------|-----|------|------|------|-----|------|
|          |     | B&C  | young | adult | senior |      | M      | W    | L         | D    | B         | EA  | I    | L    | ME   | SA  | Wh   |
| 0.0      | @1  | 2.3  | 3.0   | 2.3   | 2.4    | 3.9  | 2.6    | 2.3  | 2.6       | 1.9  | 1.2       | 1.7 | 2.2  | 1.2  | 0.0  | 0.0 | 2.8  |
|          | @5  | 6.3  | 8.5   | 6.2   | 6.3    | 9.1  | 6.9    | 5.7  | 6.7       | 5.3  | 4.5       | 4.0 | 5.6  | 3.6  | 6.3  | 2.1 | 7.2  |
|          | @10 | 9.1  | 11.5  | 8.9   | 9.1    | 12.2 | 9.7    | 8.6  | 9.5       | 8.7  | 8.2       | 7.5 | 8.9  | 6.0  | 6.3  | 4.2 | 10.0 |
| 0.2      | @1  | 2.8  | 3.3   | 2.7   | 2.7    | 5.2  | 3.1    | 2.7  | 3.2       | 1.8  | 1.2       | 1.7 | 2.2  | 3.6  | 2.1  | 2.1 | 3.5  |
|          | @5  | 7.6  | 9.5   | 7.5   | 7.3    | 8.6  | 8.1    | 7.2  | 8.2       | 6.5  | 6.0       | 5.2 | 7.4  | 7.1  | 8.3  | 4.2 | 8.9  |
|          | @10 | 11.7 | 15.6  | 11.5  | 11.4   | 13.8 | 12.6   | 11.0 | 12.4      | 11.1 | 10.3      | 5.2 | 13.7 | 10.7 | 10.4 | 6.3 | 13.3 |
| 0.4      | @1  | 2.4  | 4.1   | 2.4   | 2.0    | 4.4  | 2.7    | 2.1  | 2.8       | 1.7  | 1.4       | 2.3 | 4.1  | 2.4  | 6.3  | 2.1 | 2.9  |
|          | @5  | 6.9  | 9.7   | 6.9   | 6.3    | 10.7 | 7.1    | 6.5  | 7.5       | 5.3  | 5.2       | 4.6 | 7.8  | 7.1  | 8.3  | 2.1 | 8.1  |
|          | @10 | 10.3 | 13.8  | 10.6  | 9.3    | 14.3 | 10.4   | 10.1 | 11.0      | 8.8  | 9.1       | 5.2 | 11.5 | 8.3  | 18.8 | 4.2 | 11.7 |
| 0.6      | @1  | 2.4  | 2.9   | 2.8   | 1.9    | 5.2  | 2.3    | 2.5  | 2.7       | 2.0  | 1.9       | 1.1 | 3.3  | 1.2  | 2.1  | 0.0 | 2.9  |
|          | @5  | 7.0  | 9.9   | 7.7   | 6.1    | 10.4 | 7.1    | 7.1  | 7.7       | 6.4  | 6.5       | 5.7 | 7.8  | 4.8  | 8.3  | 2.1 | 8.1  |
|          | @10 | 10.7 | 15.8  | 11.1  | 9.4    | 14.6 | 11.0   | 10.4 | 11.5      | 9.4  | 9.3       | 8.0 | 13.7 | 8.3  | 10.4 | 4.2 | 12.0 |
| 0.8      | @1  | 2.2  | 4.0   | 2.1   | 1.9    | 4.4  | 2.2    | 2.2  | 2.5       | 1.3  | 1.4       | 1.1 | 2.2  | 3.6  | 0.0  | 0.0 | 2.8  |
|          | @5  | 6.5  | 10.9  | 6.4   | 5.5    | 11.5 | 6.6    | 6.2  | 7.1       | 5.8  | 5.7       | 4.6 | 6.3  | 7.1  | 6.3  | 2.1 | 7.6  |
|          | @10 | 9.9  | 15.0  | 9.5   | 8.9    | 15.4 | 10.2   | 9.4  | 10.7      | 9.0  | 8.1       | 7.5 | 12.2 | 9.5  | 10.4 | 4.2 | 11.2 |
| 1.0      | @1  | 1.6  | 3.1   | 1.6   | 1.3    | 3.1  | 1.7    | 1.7  | 1.9       | 0.8  | 1.2       | 0.6 | 1.5  | 1.2  | 4.2  | 0.0 | 2.0  |
|          | @5  | 5.1  | 8.1   | 5.3   | 4.2    | 9.1  | 5.1    | 5.1  | 5.7       | 3.7  | 4.0       | 3.4 | 5.2  | 4.8  | 10.4 | 0.0 | 6.0  |
|          | @10 | 7.9  | 12.7  | 7.7   | 6.6    | 12.5 | 8.0    | 7.6  | 8.6       | 6.2  | 6.7       | 6.3 | 8.1  | 7.1  | 14.6 | 2.1 | 9.2  |

Table 4. Details of the normalized self similarity score for OpenCLIP. Characters in each table are: 1) In gender: **Man** and **Woman**; 2) In ethnicity: **Black**, **East Asia**, **Indian**, **Latino**, **Middle East**, **Southeast Asia**, and **White**.

| $\alpha$ | gender |       | ethnicity |       |       |        |        |        |       | age   |       |       |        |        |        |        |        |              |
|----------|--------|-------|-----------|-------|-------|--------|--------|--------|-------|-------|-------|-------|--------|--------|--------|--------|--------|--------------|
|          | M      | W     | EA        | I     | SA    | Wh     | ME     | L      | B     | 0-2   | 3-9   | 10-19 | 20-29  | 30-39  | 40-49  | 50-59  | 60-69  | more than 70 |
| 0.0      | -0.210 | 0.210 | -0.366    | 0.463 | 0.377 | -0.678 | -0.640 | 0.301  | 0.543 | 1.247 | 1.041 | 0.635 | -0.091 | -0.497 | -0.452 | -0.442 | -0.754 | -0.687       |
| 0.2      | -0.671 | 0.671 | -0.097    | 0.563 | 0.420 | -0.851 | -0.636 | 0.122  | 0.479 | 1.290 | 0.997 | 0.538 | -0.213 | -0.618 | -0.575 | -0.497 | -0.590 | -0.331       |
| 0.4      | -0.192 | 0.192 | -0.272    | 0.332 | 0.196 | -0.568 | -0.374 | 0.111  | 0.575 | 0.507 | 0.581 | 0.472 | -0.170 | -0.336 | -0.216 | -0.138 | -0.309 | -0.392       |
| 0.6      | -0.176 | 0.176 | -0.419    | 0.523 | 0.212 | -0.781 | -0.454 | 0.013  | 0.906 | 1.045 | 0.491 | 0.440 | -0.371 | -0.567 | -0.341 | -0.233 | -0.318 | -0.146       |
| 0.8      | -0.128 | 0.128 | -0.503    | 0.347 | 0.138 | -0.557 | -0.274 | -0.017 | 0.865 | 0.244 | 0.253 | 0.420 | -0.274 | -0.234 | -0.097 | 0.051  | -0.104 | -0.258       |
| 1.0      | -0.099 | 0.099 | -0.322    | 0.245 | 0.192 | -0.382 | -0.130 | -0.040 | 0.437 | 0.235 | 0.171 | 0.399 | -0.220 | -0.232 | -0.066 | -0.036 | -0.047 | -0.204       |

Table 5. Details of the person preference score for OpenCLIP. Characters in each table are: 1) In gender: **Man** and **Woman**; 2) In ethnicity: **Black**, **East Asia**, **Indian**, **Latino**, **Middle East**, **Southeast Asia**, and **White**.

| $\alpha$ | gender |       | ethnicity |       |       |       |       |       |       | age   |       |       |       |       |       |       |       |              |
|----------|--------|-------|-----------|-------|-------|-------|-------|-------|-------|-------|-------|-------|-------|-------|-------|-------|-------|--------------|
|          | M      | W     | EA        | I     | SA    | Wh    | ME    | L     | B     | 0-2   | 3-9   | 10-19 | 20-29 | 30-39 | 40-49 | 50-59 | 60-69 | more than 70 |
| 0.0      | 0.646  | 0.660 | 0.518     | 0.486 | 0.513 | 0.507 | 0.491 | 0.505 | 0.484 | 0.447 | 0.430 | 0.394 | 0.380 | 0.375 | 0.365 | 0.361 | 0.357 | 0.356        |
| 0.2      | 0.823  | 0.895 | 0.709     | 0.653 | 0.668 | 0.703 | 0.674 | 0.669 | 0.621 | 0.851 | 0.865 | 0.896 | 0.900 | 0.895 | 0.886 | 0.883 | 0.873 | 0.859        |
| 0.4      | 0.904  | 0.879 | 0.637     | 0.581 | 0.608 | 0.641 | 0.611 | 0.602 | 0.551 | 0.730 | 0.758 | 0.772 | 0.791 | 0.785 | 0.770 | 0.752 | 0.726 | 0.676        |
| 0.6      | 0.976  | 0.994 | 0.353     | 0.330 | 0.329 | 0.331 | 0.304 | 0.311 | 0.307 | 0.825 | 0.840 | 0.838 | 0.832 | 0.808 | 0.778 | 0.741 | 0.712 | 0.702        |
| 0.8      | 0.974  | 0.955 | 0.079     | 0.055 | 0.069 | 0.089 | 0.067 | 0.068 | 0.064 | 0.883 | 0.951 | 0.979 | 0.984 | 0.981 | 0.978 | 0.969 | 0.952 | 0.939        |
| 1.0      | 1.000  | 1.000 | 0.149     | 0.130 | 0.134 | 0.183 | 0.164 | 0.146 | 0.113 | 0.943 | 0.978 | 0.988 | 0.989 | 0.985 | 0.978 | 0.962 | 0.938 | 0.905        |

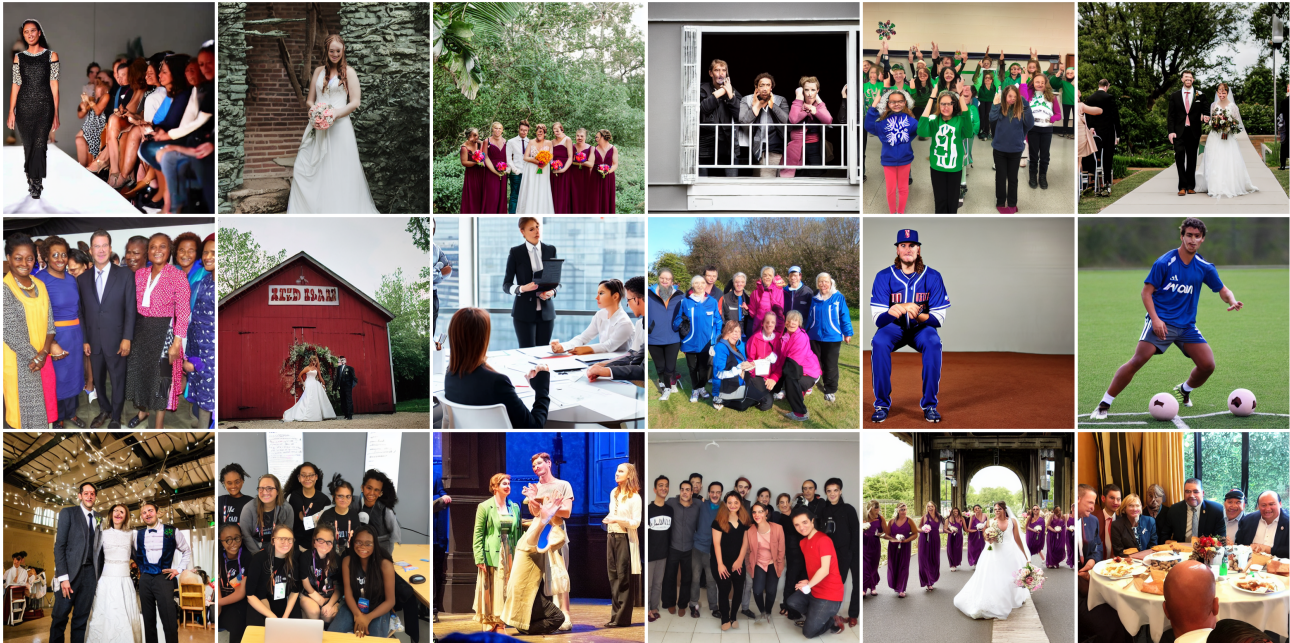

Figure 1. More examples of blurry faces in the generated images.

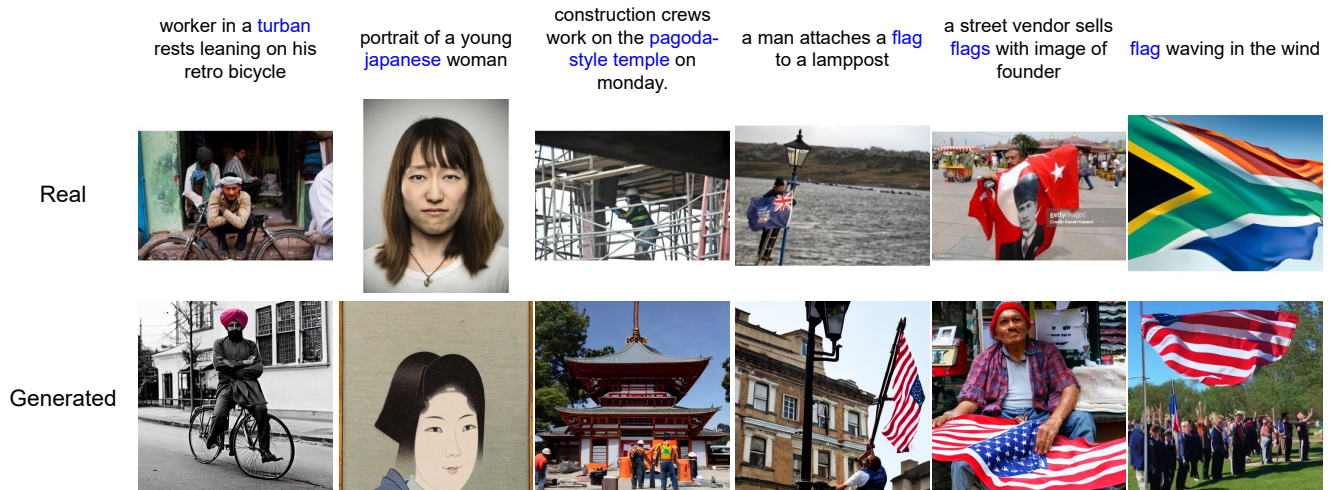

Figure 2. More examples of stereotyping in the generated images.
